# Supplementary material
Source: MDPI journal article supplement (https://www.mdpi.com/2304-6740/10/12/262)
Supplement: s1 [file s1]

## 2D and 3D coordination polymers based on Ln(III) and 2,5-diiodoterephthalates: structures and luminescent behavior

Alexander S. Zaguzin, Mikhail A. Bondarenko, Pavel A. Abramov, Marianna I. Rakhmanova, Maxim N. Sokolov, Vladimir P. Fedin and Sergey A. Adonin

**Table S1. XRD Experimental details**

For all structures: triclinic,  $P\bar{1}$ ,  $Z = 1$ .

|                                                                                     | <b>1</b>                                                                                                                                                                                                        | <b>2</b>                                                                                                                            |
|-------------------------------------------------------------------------------------|-----------------------------------------------------------------------------------------------------------------------------------------------------------------------------------------------------------------|-------------------------------------------------------------------------------------------------------------------------------------|
| Chemical formula                                                                    | $C_{42}H_{48}I_6La_2N_6O_{18}$                                                                                                                                                                                  | $C_{36}H_{34}I_6La_2N_4O_{16}$                                                                                                      |
| $M_r$                                                                               | 1964.08                                                                                                                                                                                                         | 1817.89                                                                                                                             |
| Temperature (K)                                                                     | 100                                                                                                                                                                                                             | 150                                                                                                                                 |
| $a, b, c$ (Å)                                                                       | 11.5427(8), 11.7888(5),<br>13.1459(10)                                                                                                                                                                          | 10.0810 (3), 11.1622 (2), 12.3422 (3)                                                                                               |
| $\alpha, \beta, \gamma$ (°)                                                         | 110.115(5), 115.234 (8),<br>97.442(5)                                                                                                                                                                           | 78.164 (1), 70.692 (1), 88.909 (1)                                                                                                  |
| $V$ (Å <sup>3</sup> )                                                               | 1436.89 (19)                                                                                                                                                                                                    | 1281.05 (6)                                                                                                                         |
| Radiation type                                                                      | Cu Ka                                                                                                                                                                                                           | Mo Ka                                                                                                                               |
| $\mu$ (mm <sup>-1</sup> )                                                           | 37.24                                                                                                                                                                                                           | 5.33                                                                                                                                |
| Crystal size (mm)                                                                   | 0.10 × 0.03 × 0.01                                                                                                                                                                                              | 0.12 × 0.05 × 0.05                                                                                                                  |
| Diffractometer                                                                      | SuperNova, Single source at<br>offset/far, HyPix3000                                                                                                                                                            | Bruker D8 Venture<br>diffractometer                                                                                                 |
| Absorption<br>correction                                                            | Multi-scan<br><i>CrysAlis PRO</i> 1.171.41.122a<br>(Rigaku Oxford Diffraction,<br>2021) Empirical absorption<br>correction using spherical<br>harmonics, implemented in<br>SCALE3 ABSPACK scaling<br>algorithm. | Multi-scan<br><i>SADABS</i> 2016/2: Krause, L., Herbst-<br>Irmer, R., Sheldrick G.M. & Stalke D.,<br>J. Appl. Cryst. 48 (2015) 3-10 |
| $T_{min}, T_{max}$                                                                  | 0.403, 1.000                                                                                                                                                                                                    | 0.589, 0.746                                                                                                                        |
| No. of measured,<br>independent and<br>observed [ $I > 2\sigma(I)$ ]<br>reflections | 12125, 5313, 4434                                                                                                                                                                                               | 17957, 6007, 5294                                                                                                                   |
| $R_{int}$                                                                           | 0.067                                                                                                                                                                                                           | 0.028                                                                                                                               |
| $\theta$ values (°)                                                                 | $\theta_{max} = 70.0$ , $\theta_{min} = 4.2$                                                                                                                                                                    | $\theta_{max} = 27.9$ , $\theta_{min} = 1.8$                                                                                        |
| $(\sin \theta/\lambda)_{max}$ (Å <sup>-1</sup> )                                    | 0.610                                                                                                                                                                                                           | 0.658                                                                                                                               |
| Range of $h, k, l$                                                                  | $-12 \leq h \leq 13$ , $-14 \leq k \leq 14$ ,<br>$-15 \leq l \leq 15$                                                                                                                                           | $-13 \leq h \leq 13$ , $-14 \leq k \leq 14$ ,<br>$-16 \leq l \leq 15$                                                               |
| $R[F^2 > 2\sigma(F^2)]$ , $wR(F^2)$ ,<br>$S$                                        | 0.078, 0.223, 1.11                                                                                                                                                                                              | 0.037, 0.084, 1.09                                                                                                                  |
| No. of reflections,                                                                 | 5313, 329, 48                                                                                                                                                                                                   | 6007, 309, 6                                                                                                                        |

|                                                             |                                                                                      |                                                                                      |
|-------------------------------------------------------------|--------------------------------------------------------------------------------------|--------------------------------------------------------------------------------------|
| parameters,<br>restraints                                   |                                                                                      |                                                                                      |
| H-atom treatment                                            | H-atom parameters constrained                                                        | H atoms treated by a mixture of independent and constrained refinement               |
| Weighting scheme                                            | $w = 1/[\sigma^2(F_o^2) + (0.1277P)^2 + 19.6071P]$<br>where $P = (F_o^2 + 2F_c^2)/3$ | $w = 1/[\sigma^2(F_o^2) + (0.0215P)^2 + 10.7312P]$<br>where $P = (F_o^2 + 2F_c^2)/3$ |
| $\Delta\rho_{\max}, \Delta\rho_{\min}$ (e Å <sup>-3</sup> ) | 2.34, -3.46                                                                          | 1.49, -2.28                                                                          |

Computer programs: *CrysAlis PRO* 1.171.41.122a (Rigaku OD, 2021), *APEX3* (Bruker-AXS, 2016), *SAINT* (Bruker-AXS, 2016), *SHELXT* 2018/2 (Sheldrick, 2018), *SHELXT* 2014/5 (Sheldrick, 2014), *SHELXL2017/1* (Sheldrick, 2017).

**Table S2. Selected geometric parameters (Å)**

| <b>1</b>            |            |                      |            |
|---------------------|------------|----------------------|------------|
| O1—La1              | 2.510 (9)  | O6—La1 <sup>i</sup>  | 2.715 (9)  |
| O2—La1              | 2.552 (10) | O7—La1 <sup>i</sup>  | 2.629 (10) |
| O3—La1              | 2.475 (9)  | O8—La1 <sup>ii</sup> | 2.569 (8)  |
| O4—La1 <sup>i</sup> | 2.514 (8)  | O9—La1 <sup>ii</sup> | 2.579 (10) |
| O6—La1              | 2.451 (9)  |                      |            |
| <b>2</b>            |            |                      |            |
| O1—La1              | 2.515 (4)  | O5—La1 <sup>i</sup>  | 2.650 (4)  |
| O2—La1              | 2.555 (4)  | O6—La1 <sup>i</sup>  | 2.613 (4)  |
| O3—La1              | 2.574 (4)  | O7—La1 <sup>i</sup>  | 2.503 (4)  |
| O4—La1              | 2.492 (4)  | O8—La1               | 2.514 (4)  |
| O5—La1              | 2.539 (4)  |                      |            |

Symmetry code(s): (i) -x+1, -y+1, -z+1; (ii) -x+1, -y+2, -z+1.

Steady-state, room temperature luminescence measurements were conducted using a Jobin Yvon FluoroLog 3 with a 450 W xenon source and pulsed xenon lamps as light sources, cooled detector and double grating excitation and emission monochromators. All excitation and emission spectra were corrected for the sensitivity of the detector and wavelength dependence of the output power of the source. The photoluminescence quantum yields ( $\varphi_f$ ) were measured using a Fluorolog 3 Quanta- $\varphi$  device at 300 K.

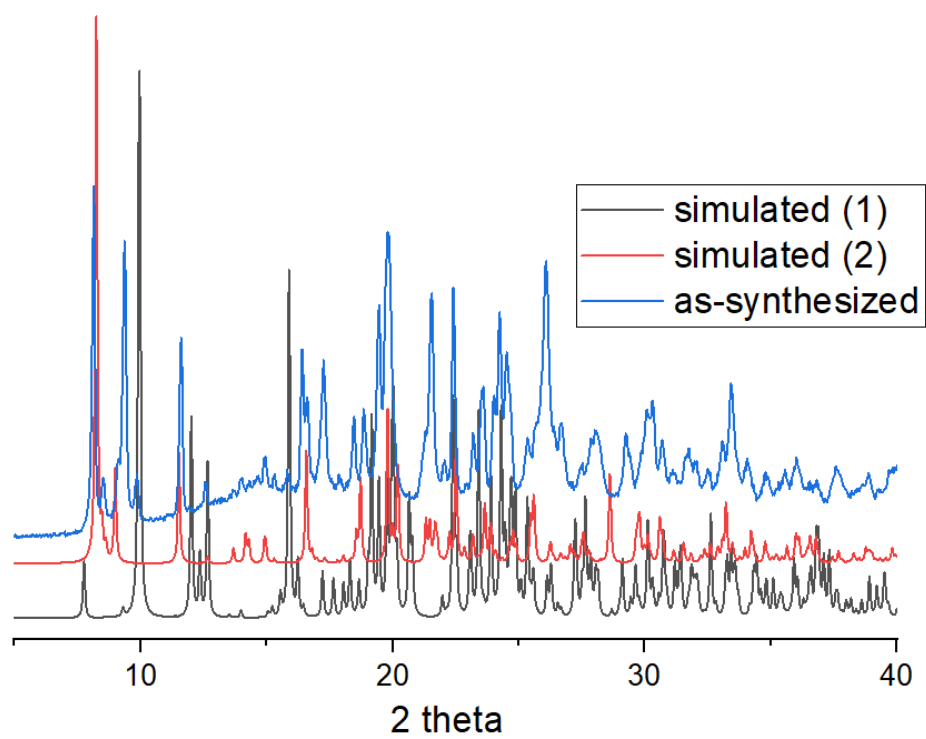

**Figure S1.** PXRD data for the solid containing **1** and **2**.

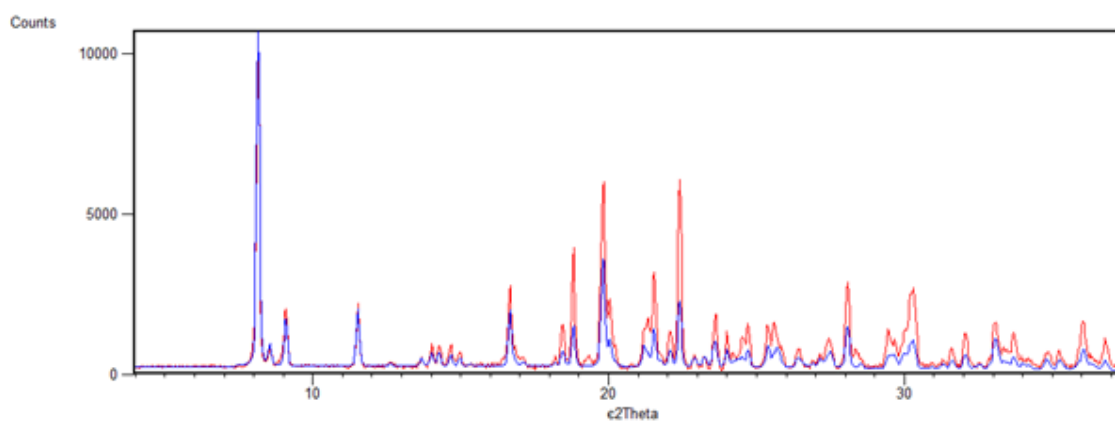

**Figure S2.** PXRD data for **3** (calculated and experimental).

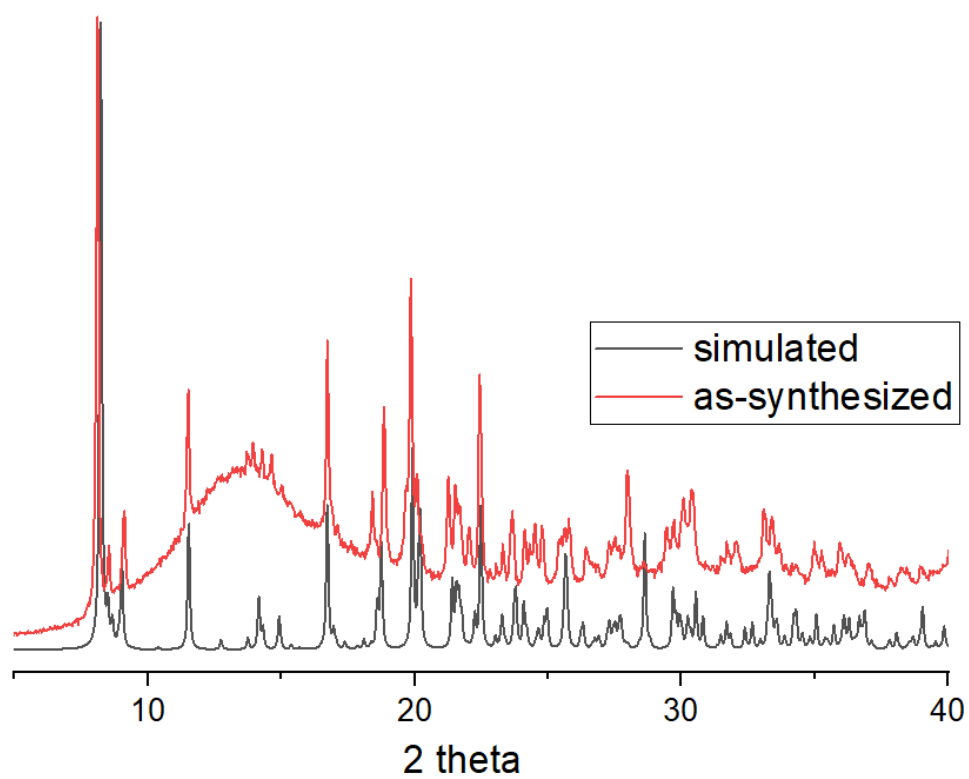

**Figure S3.** PXRD data for **4** (calculated and experimental).

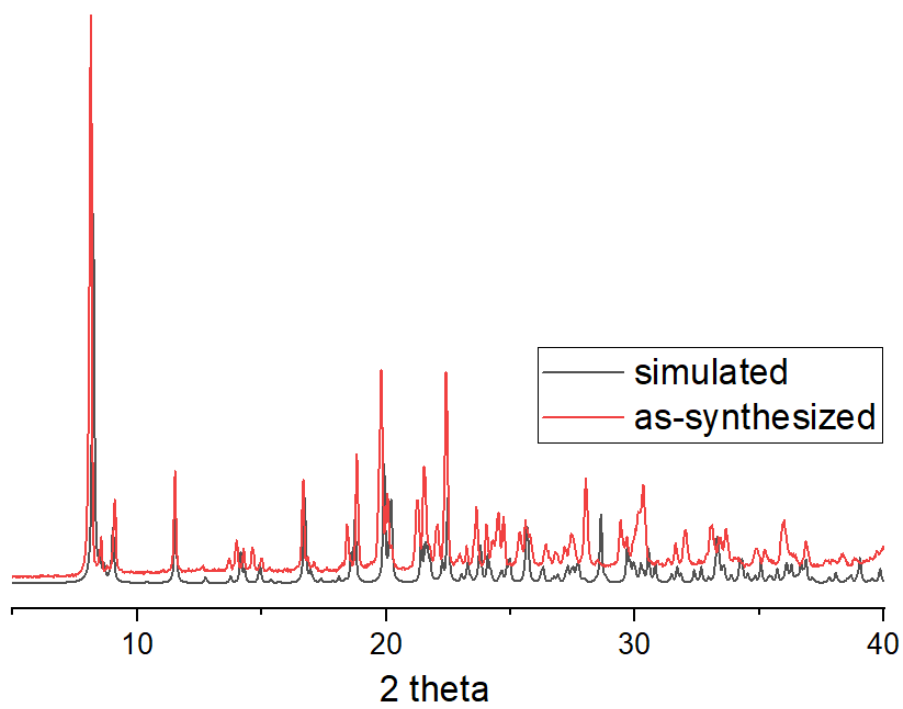

**Figure S4.** PXRD data for **5** (calculated and experimental).

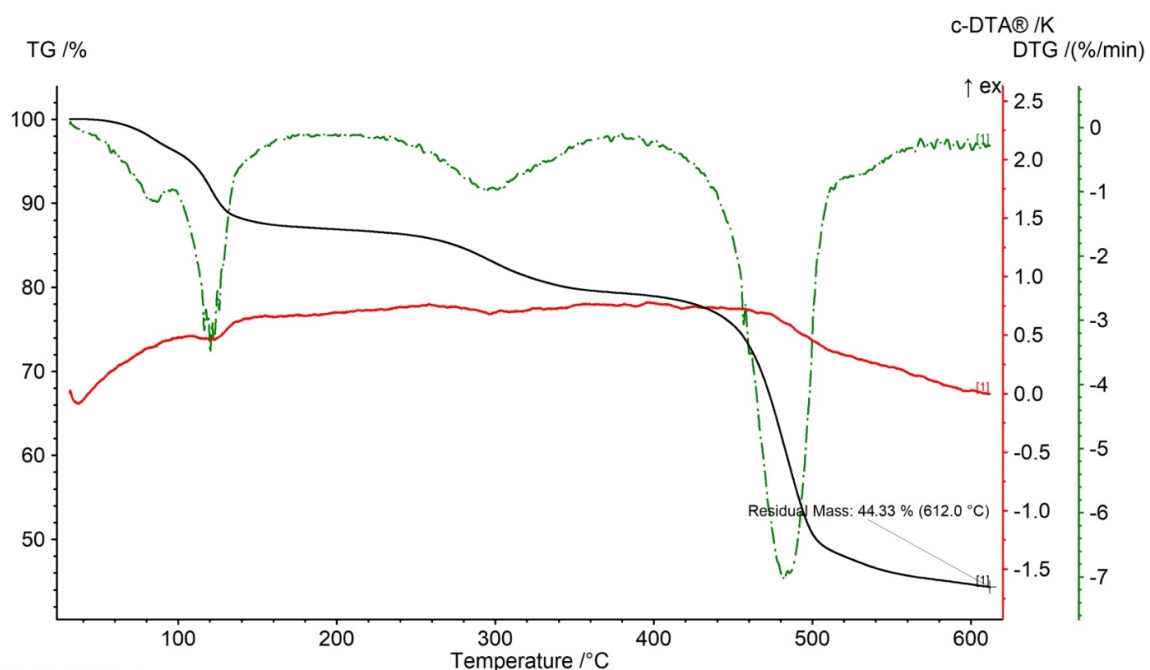

**Figure S5.** TG, DTA and DSC data for **4**.

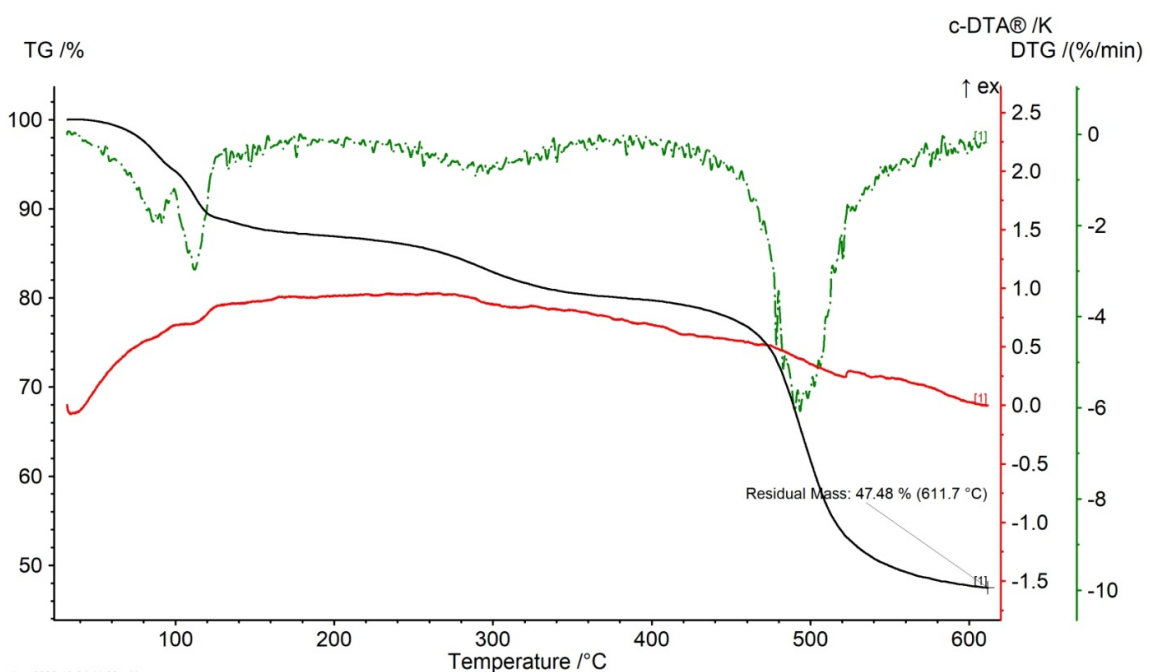

**Figure S6.** TG, DTA and DSC data for **5**

#### FTIR data

1/2: 1644 m, 1608 m, 1568 m, 1506 m, 1458 m, 1376s, 1296 m, 1105 m, 1043 m, 913 m, 835 s, 798 w, 781 w, 673 m, 565 m.

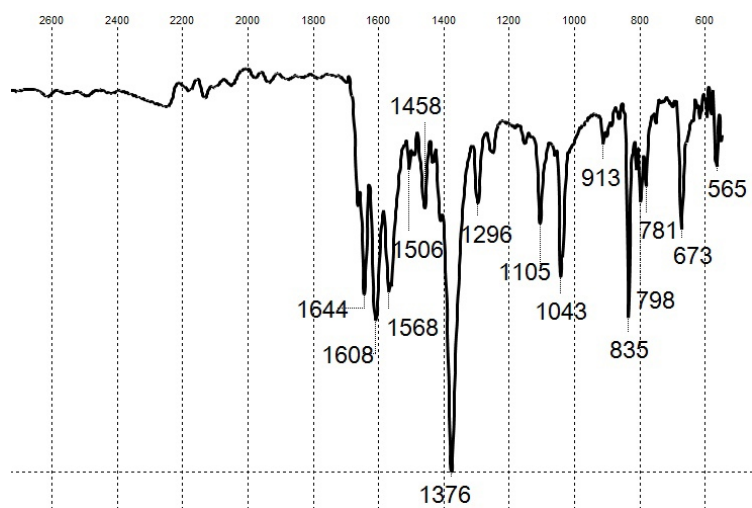

3: 1647 m, 1610 m, 1563 s, 1464 m, 1380s, 1299 m, 1109 m, 1041 a, 902 w, 817 s, 783 w, 781 w, 678 m.

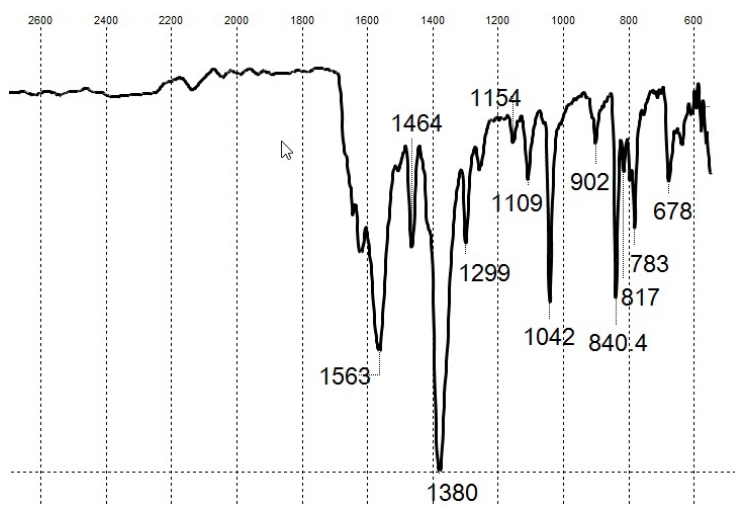

4: 1644 m, 1611 s, 1571 m, 1462 m, 1379 s, 1296 m, 1106 m, 1036 m, 912 w, 817 s, 799 w, 674 m, 564 w

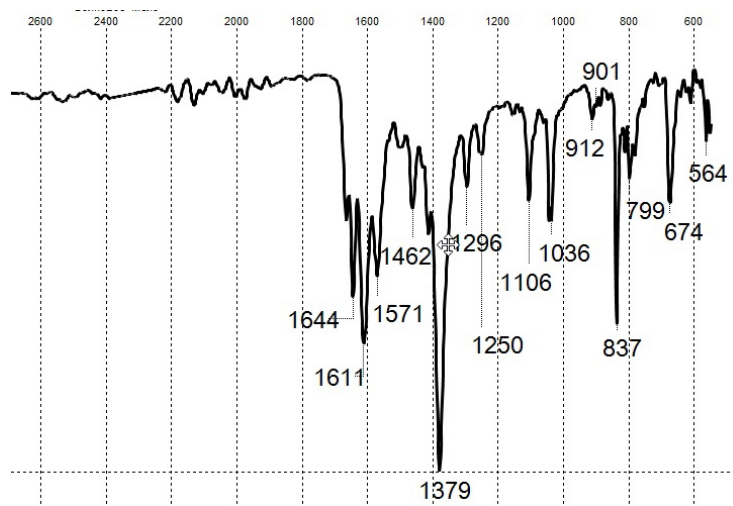

#### Element analysis data

|          | C, H, N (calcd)   | C, H, N (found)   |
|----------|-------------------|-------------------|
| <b>3</b> | 23.69; 1.88; 3.07 | 23.78; 1.95; 3.18 |
| <b>4</b> | 23.43; 1.86; 3.04 | 23.53; 1.97; 3.14 |
| <b>5</b> | 23.40; 1.86; 3.04 | 23.54; 1.98; 3.17 |
